# Supplementary material for: Aberrant let7a/HMGA2 signaling activity with unique clinical phenotype in JAK2-mutated myeloproliferative neoplasms
Source: PubMed Central journal article supplement — Haematologica. 2017 Jan 2;102(3):509–18. doi: 10.3324/haematol.2016.154385 (PMC5394969; doi:10.3324/haematol.2016.154385), 2017-03
Supplement: 2016_154385-Disclosures_and_Contributions.pdf [file 2016_154385-Disclosures_and_Contributions.pdf]

Haematologica  
HAEMATOL/2016/154385  
Version 3

Aberrant Let7a/HMGA2 signaling activity with unique clinical phenotype  
in JAK2-mutated myeloproliferative neoplasms

Chih-Cheng Chen, Jie-Yu You, Jrhau Lung, Cih-En Huang, Yi-Yang  
Chen, Yu-Wei Leu, Hsing-Ying Ho, Chian-Pei Li, Chang-Hsien Lu,  
Kuan-Der Lee, Chia-Chen Hsu, and Jyh-Pyng Gau

Disclosures: All authors declare there is no conflict of interest and competing financial interests in relation to the work.

Contributions: C-C C. and J-P G. conceived and designed the experiments. C-C C., J-Y Y., C-E H., Y-Y C., C-H L., K-D L., and J-P G. provided patient care as well as collected all demographic data. J L., Y-W L., H-Y H., C-P L., and C-C H. performed all the cell line experiments as well as clinical sample analyses. C-C C., C-C H., and J-P G. interpreted the results of all laboratory experiments. C-C C. analyzed relevant clinical parameters and performed statistical comparison. C-C C. and C-C H. wrote the paper.
